# Supplementary material for: Chromosome congression is promoted by CENP-Q- and CENP-E-dependent pathways
Source: PubMed Central journal article supplement (PMC4282051; doi:10.1242/jcs.163659), 2015-01-01
Supplement: supp_128.1.171_JCS163659.pdf [file supp_128.1.171_JCS163659.pdf]

# Supplementary Figure 1

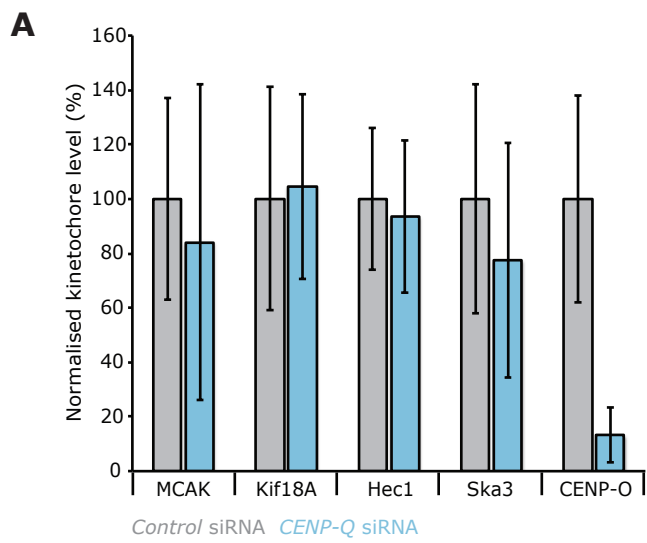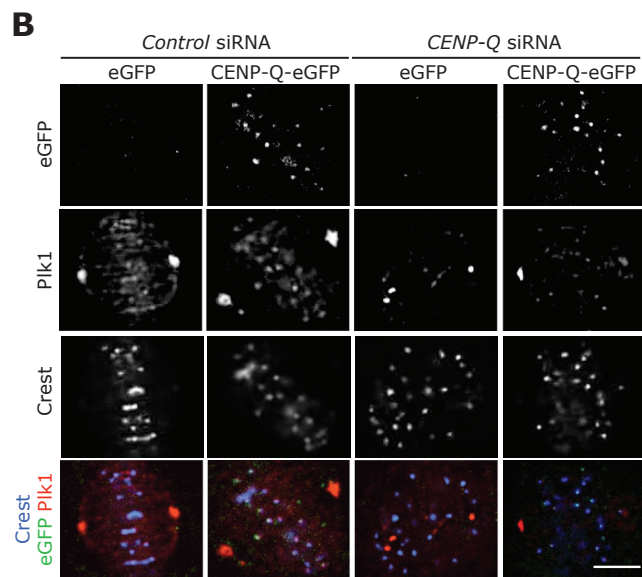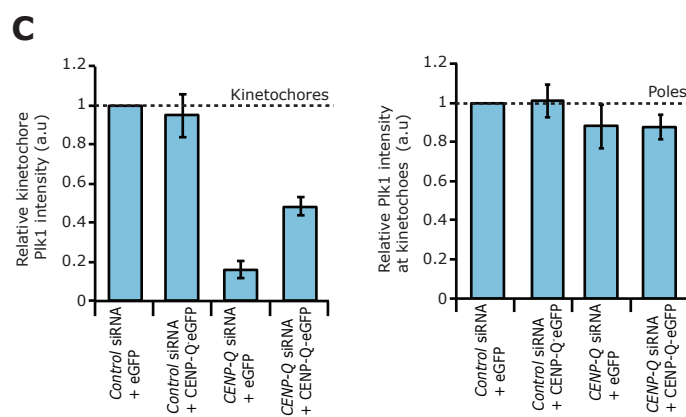

# Supplementary Figure 2

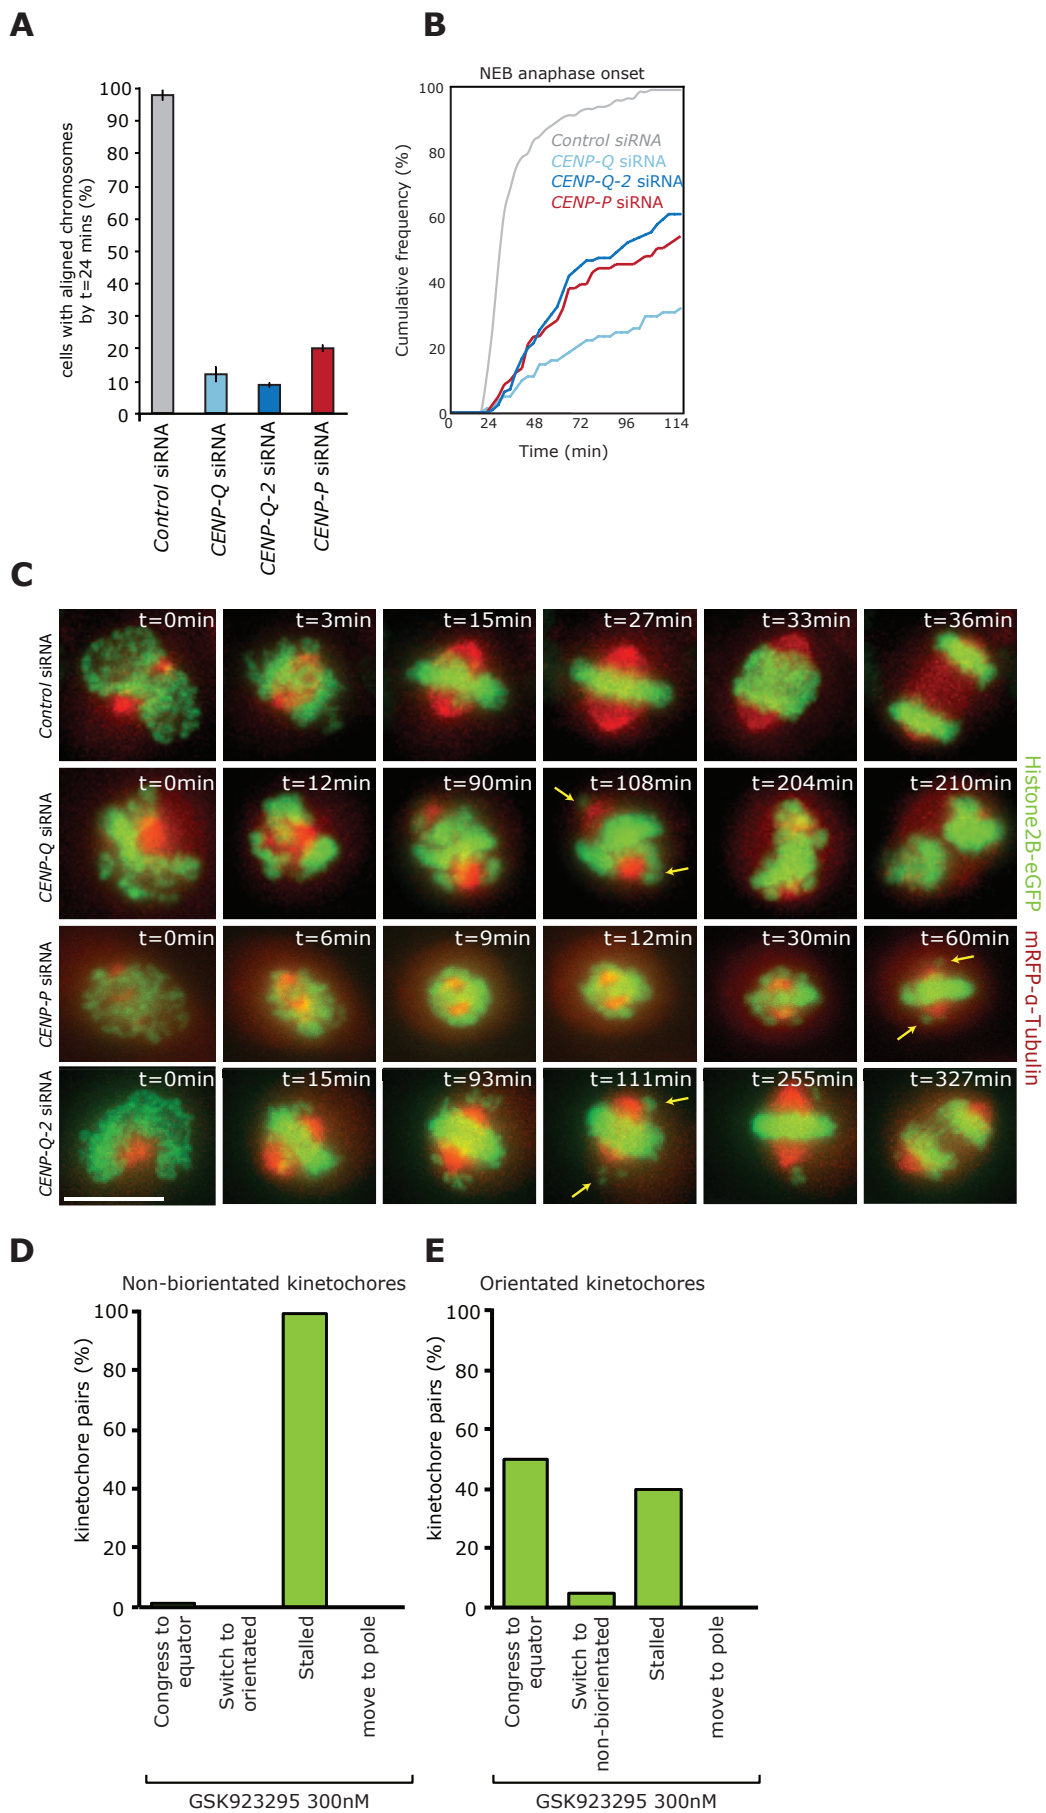

# Supplementary Figure 3

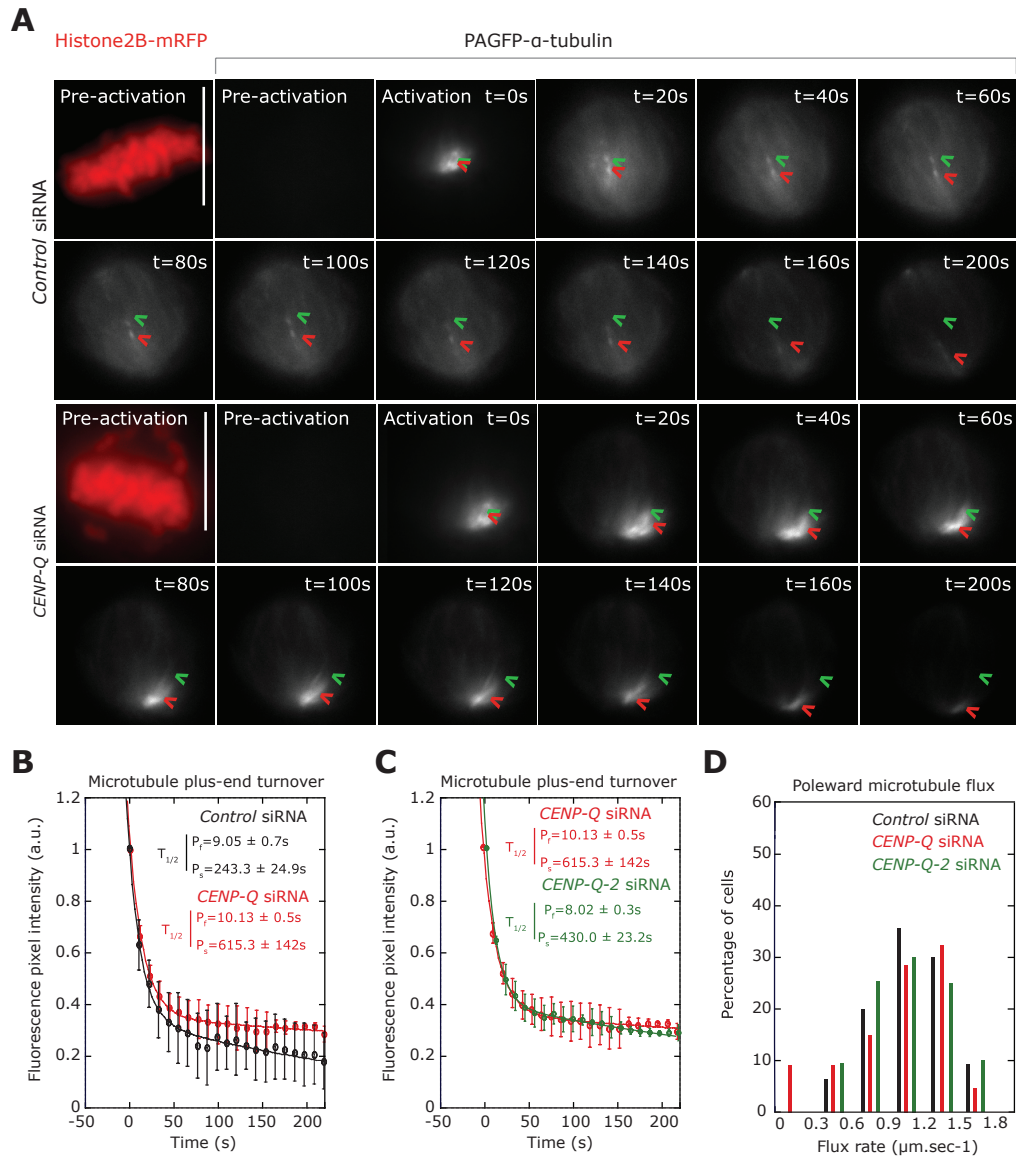

# Supplementary Figure 4

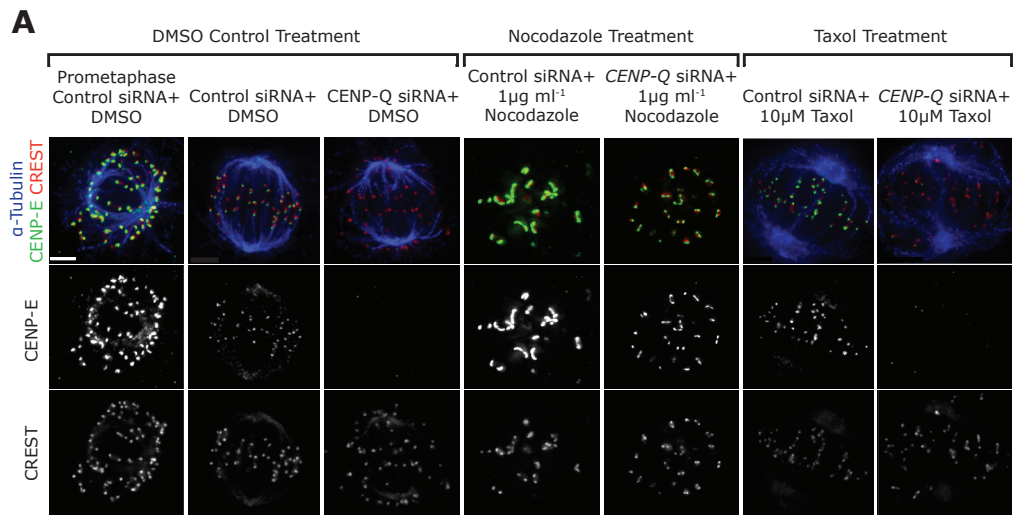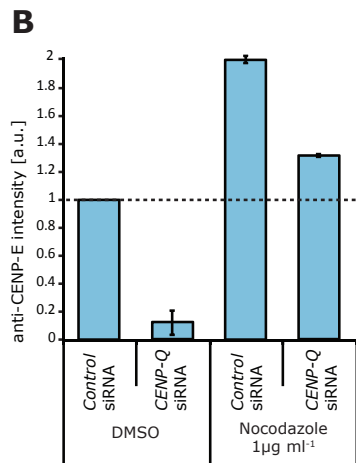

## Supplementary Figure Legends

### Supplementary Figure 1 – Kinetochores-binding of Plk1, Ndc80, Ska, CENP-O, Kif18A and MCAK in CENP-Q depleted cells.

(A) Quantification of Hec1, Ska3, CENP-O, Kif18A and MCAK levels at congressed kinetochore pairs in CENP-Q depleted metaphase HeLa E1 cells,  $n=2 \geq 150$  kinetochores per condition.

(B) Immunofluorescence images of Plk1 rescue experiment in HeLa K cells. Cells were treated with control or CENP-Q siRNA for 12 hr and then transfected with an siRNA resistant plasmid expressing CENP-Q-eGFP or a control eGFP expression plasmid for a further 48 hr. To reduce the effect of mitotic stage on alignment cells were arrested in metaphase with  $0.1 \mu\text{M}$  MG132 for 90 min prior to fixation, and stained with antibodies against Crest (blue) and Plk1 (red). Scale bar indicates  $5 \mu\text{m}$ .

(C) Left panel: Quantification of kinetochore Plk1 levels in the CENP-Q rescue experiment,  $n=3, \geq 300$  kinetochores per condition. Right panel: Quantification of polar Plk1 signal in the CENP-Q rescue experiment. A  $5 \times 5$  pixel box was used to measure the mean intensity at the center of the pole,  $n=3, 120$  poles per condition.

### Supplementary Figure 2 – CENP-Q congression phenotypes can be recreated using a second CENP-Q siRNA, CENP-P siRNA and CENP-E inhibition

(a) Graph showing the percentage of HeLa E1 cells expressing histone-2B-eGFP and mRFP- $\alpha$ -tubulin cells to have aligned chromosomes at 24 minutes after nuclear envelope breakdown when treated with CENP-Q (light blue), CENP-Q-2 (dark blue) and control (grey) siRNA for 48 hr or CENP-P (red) siRNA for 72 hr.

(b) Quantification of nuclear envelope breakdown (NEB) to anaphase onset time in HeLa E1 cells stably expressing H2B-eGFP/mRFP- $\alpha$ -tubulin. Cells were treated with CENP-Q (light blue), CENP-Q-2 (dark blue) and control (grey) siRNA for 48 hr or CENP-P (red) siRNA for 72 hr.

(c) Frames from live-cell movies of HeLa E1 cells expressing H2B-eGFP/mRFP- $\alpha$ -tubulin. Cells were treated with control (top row) CENP-Q (second row) CENP-Q-2 (fourth row) siRNA for 48 hr and CENP-P siRNA (third row) for 72 hr. Yellow arrows point to unaligned kinetochores. Scale bar indicates  $10 \mu\text{m}$ .

(d) The fates of non-biorientated kinetochore pairs over 5 min in HeLa K cells expressing eGFP-CENP-A and eGFP-Centrin1 after 14-hr treatment with the CENP-E inhibitor 300 nM GSK923295.

(e) The fates of biorientated pairs over 5 min in HeLa K cells expressing eGFP-CENP-A and eGFP-Centrin1 after 14-hr treatment with the CENP-E inhibitor 300nM GSK923295.

### **Supplementary Figure 3 – Depletion of CENP-Q decreases kinetochore microtubule fibre plus end turnover.**

(a) Frames from live-cell movies before and after photoactivation of stable photoactivatable GFP (PAGFP)- $\alpha$ -tubulin/H2B-mRFP HeLa cells treated with control or CENP-Q (and CENP-Q-2) siRNAs for 48 hr. Photoactivatable GFP- $\alpha$ -tubulin fluorescence was activated in a circular region near the chromosome mass in metaphase cells (detected by the H2B-mRFP signal). An H2B-mRFP (DNA) frame is shown for the first time point of the live-cell movie after activation. Scale bar represents 10  $\mu$ m.

(b-c) Quantification of fluorescence intensity decay of the activated PAGFP-  $\alpha$ -tubulin over time in control, CENP-Q (d) or CENP-Q-2 siRNA (e) treated cells. The lines through the data points (mean values) were fitted to a double exponential equation of the type  $I = P_f \exp(-kft) + P_s \exp(-kst)$ . Error bars indicate SD. The calculated half-lives of the fast (K-MT) and slow (non-K-MT) MT populations are indicated with the fitting error (SD).

(d) Quantification of poleward microtubule flux rates in cells treated with control (black bars), CENP-Q (red bars) or CENP-Q-2 siRNA (green bars)  $n = 20$  cells for each condition.

### **Supplementary Figure 4 – CENP-E binding in CENP-Q depleted cells is partially rescued by depolymerisation of microtubules**

(a) Immunofluorescence microscopy images of HeLa E1 cells stained with CENP-E (green), CREST (red) and  $\alpha$ -tubulin (blue) antibodies. Images are a z-projection (10 focal planes at 0.2  $\mu$ m spacing). Cells were treated with control siRNA or CENP-Q siRNA for 48 hr and either DMSO (14 hr), nocodazole (1  $\mu$ M, 14 hr) or taxol (10  $\mu$ M, 1 hr) before fixation.

**(b)** Quantification of CENP-E immunofluorescence levels in HeLa E1 cells treated with control siRNA or CENP-Q siRNA for 48 hr and either DMSO (14 hr) or nocodazole (1  $\mu$ M, 14 hr) before fixation. Intensities are determined at each kinetochore relative to CREST and with background subtraction,  $n \geq 100$  kinetochores per condition from 2 independent experiments. Dashed line indicates CENP-E levels in control siRNA cells + DMSO. Error bars indicate SD.

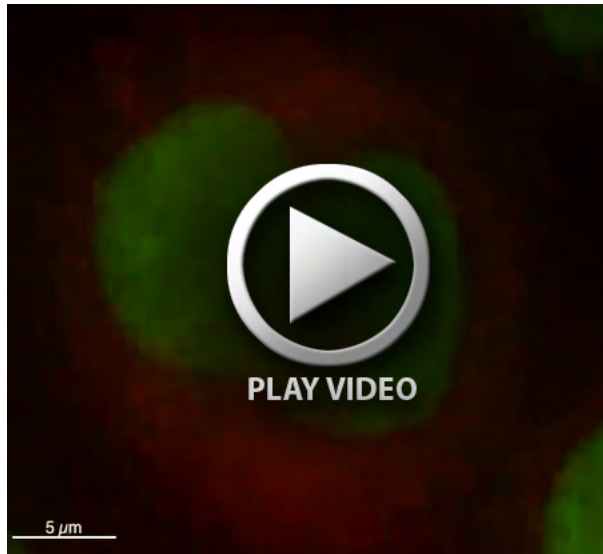

**Movie 1.** Control siRNA treated HeLa histone-2B-GFP  $\alpha$ -tubulin-mRFP cell

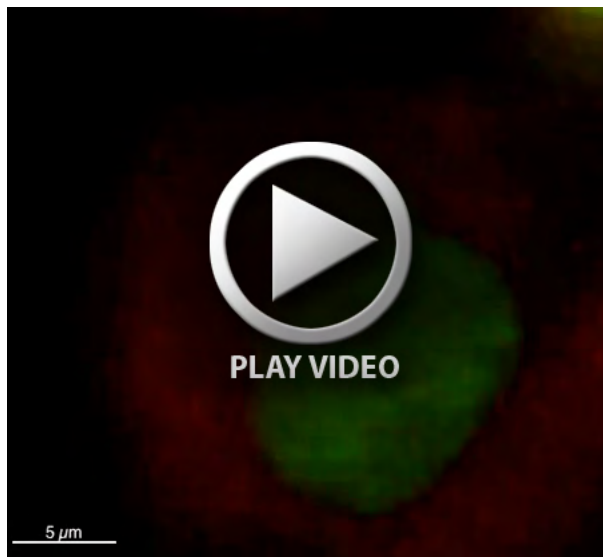

**Movie 2.** CENP-Q siRNA treated HeLa histone-2B-GFP  $\alpha$ -tubulin-mRFP cell

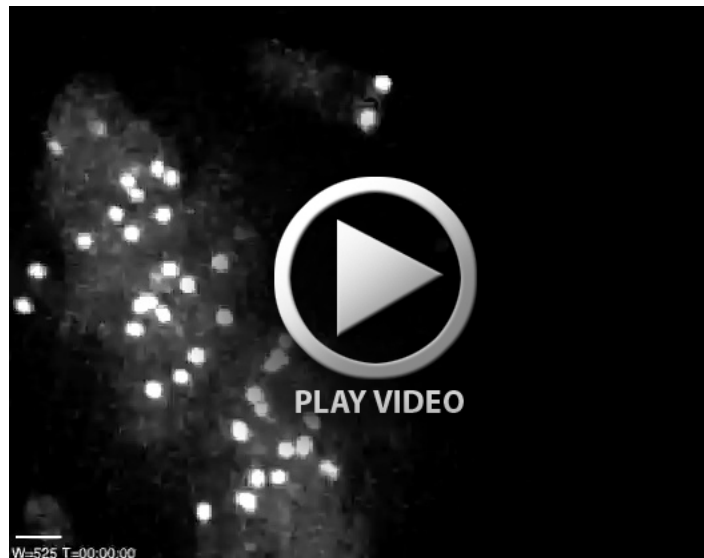

**Movie 3.** A CENP-Q depleted kinetochore pair switching from an orientated to non-biorientated state



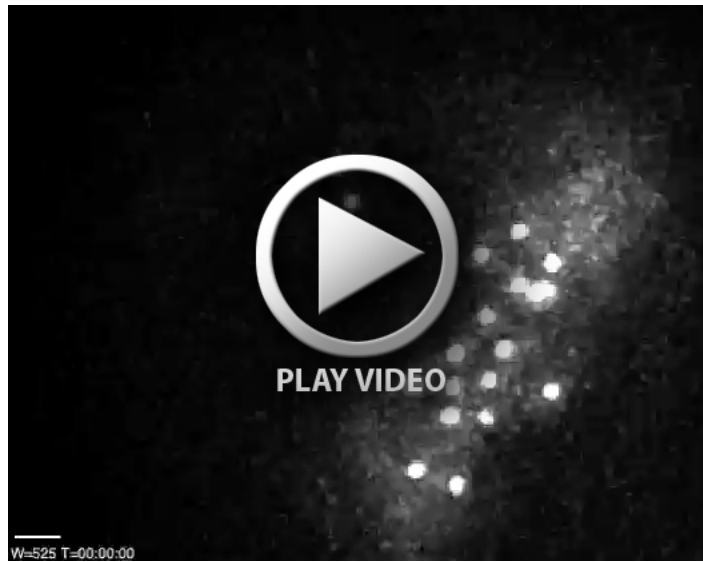

**Movie 4.** An orientated stalled kinetochore pair during CENP-Q depletion

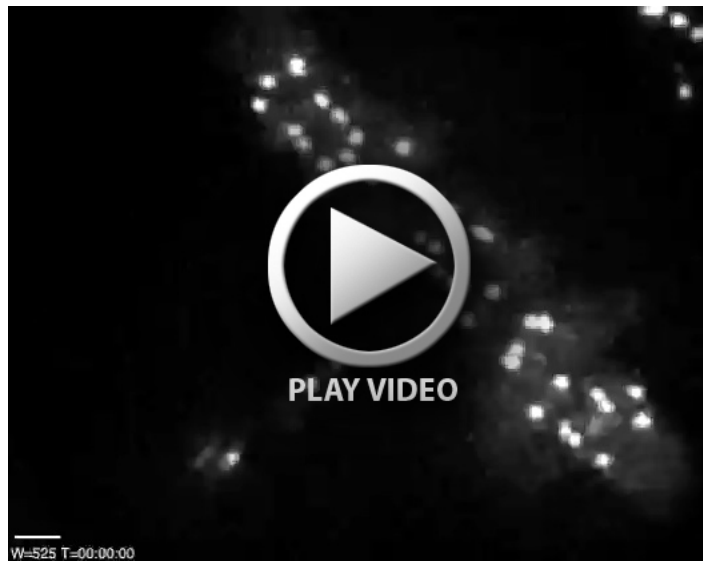

**Movie 5.** An orientated congressing kinetochore pair during CENP-E depletion

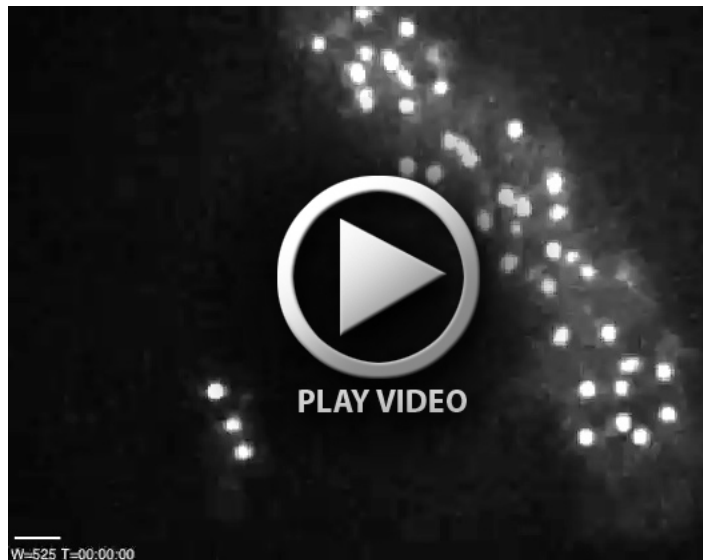

**Movie 6.** A non-biorientated stalled kinetochore pair during CENP-E depletion
